# Supplementary material
Source: PubMed Central journal article supplement (PMC4826298)
Supplement: NIHMS766466-supplement-2.pdf [file NIHMS766466-supplement-2.pdf]

## Supplemental information

### SUPPLEMENTAL FIGURES

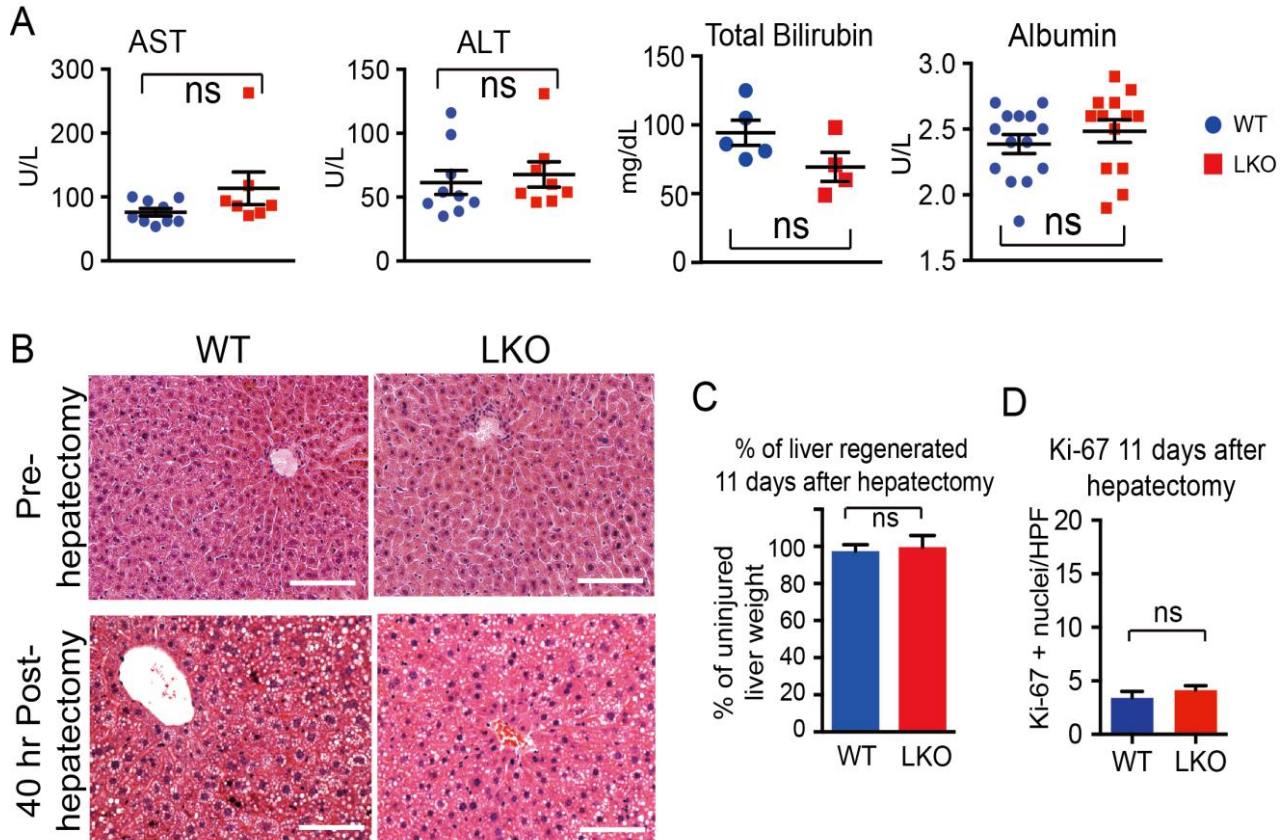

Figure S1

**Figure S1. Characterization of *Arid1a* LKO mice during liver regeneration (Related to Figure 1).**

- (A)** Aspartate aminotransferase (AST), Alanine aminotransferase (ALT), Total bilirubin, and Albumin as measured in WT and LKO mice (n is shown in the charts).
- (B)** Liver histology in *Alb-Cre; Arid1a<sup>F/F</sup>* mice at baseline and 40 hours after partial hepatectomy (H+E, Scale bar = 100 $\mu$ m).
- (C)** % of the original liver mass regenerated in WT and LKO mice 11 days after partial hepatectomy.
- (D)** Ki-67 IHC quantification in WT and LKO mice 11 days after partial hepatectomy.

All data in this figure are represented as mean  $\pm$  SEM, \*  $P < 0.05$ . "n" refers to biological replicates.

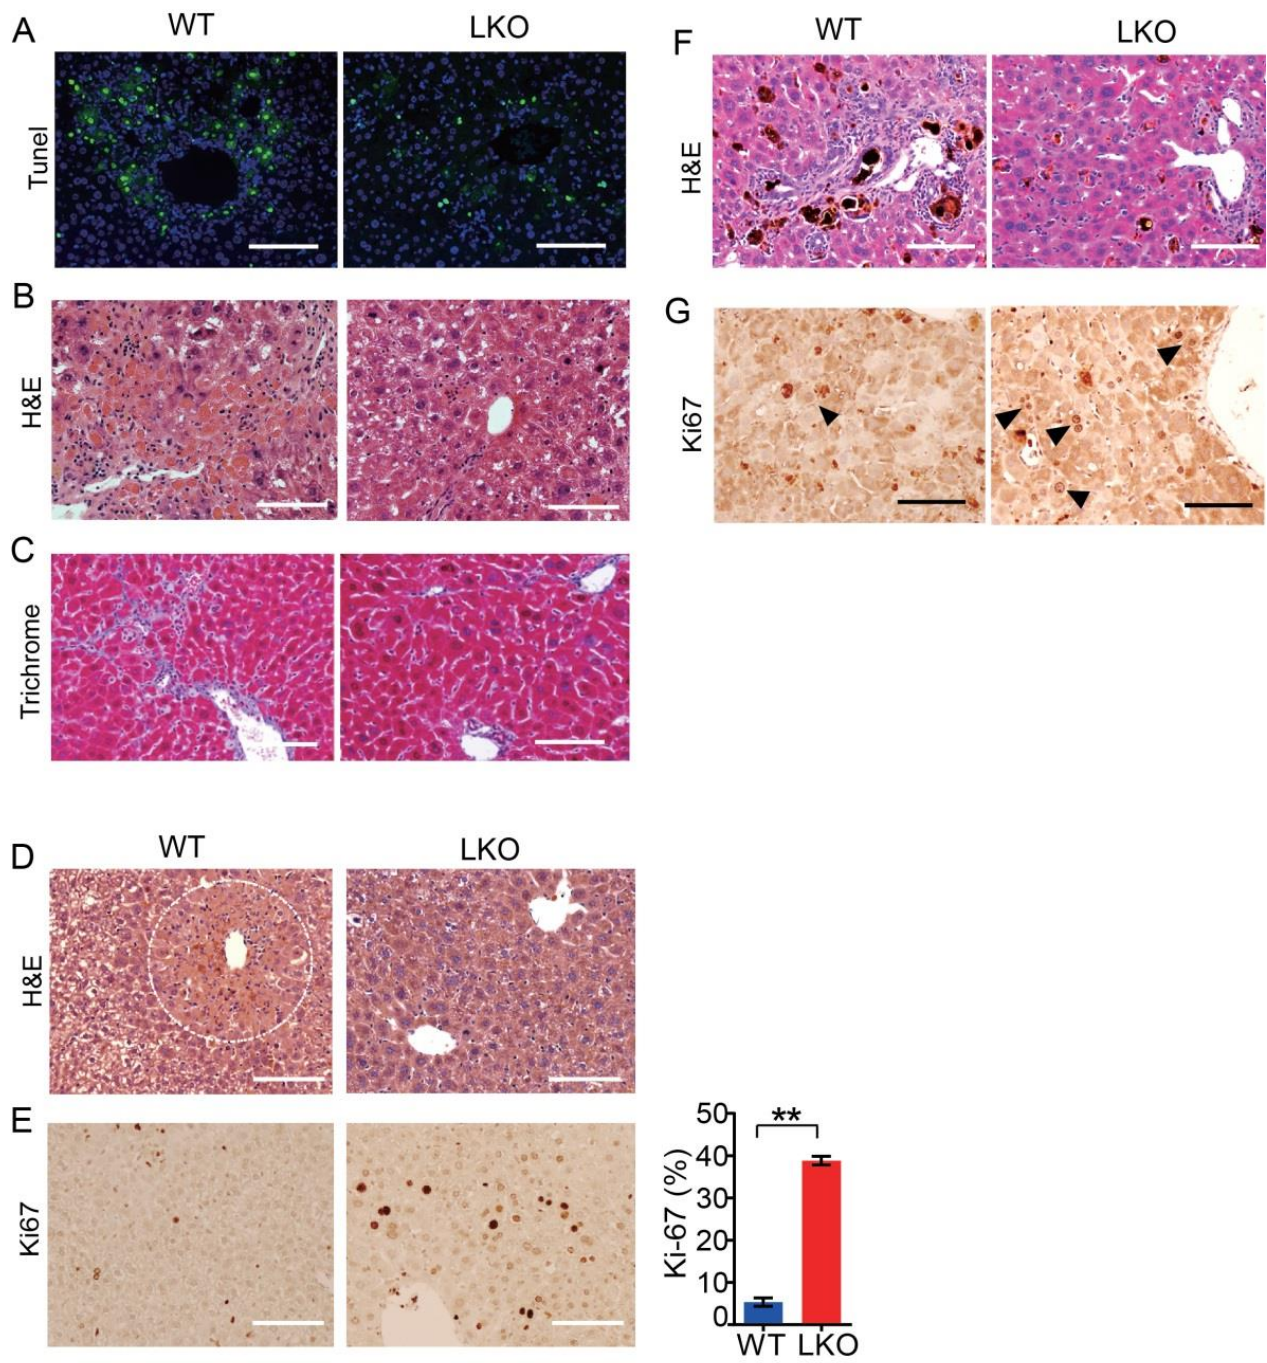

Figure S2

**Figure S2. Histological analysis after three chemical injuries (Related to Figure 2).**

- (A)** Apoptosis 24 hours after one CCL4 injection as measured by TUNEL staining (Scale bar = 100µm).
- (B)** WT and LKO liver histology in 5 month-old female mice after 12 weeks of chronic biweekly CCL4 injury with 24 biweekly injections (Scale bar = 50µm).
- (C)** In mice treated with 12 weeks of chronic biweekly CCL4 injections, fibrosis was detected with trichrome staining (Scale bar = 50µm).
- (D)** H+E of liver tissue 24 hours after a single IP injection of 300mg/kg of Acetaminophen. Peri-central zonal necrosis is present in the WT but not the LKO livers. Necrosis is seen as areas of darker pink (inside white dotted circle) against the viable hepatocytes that were pale due to steatosis and ballooning injury (Scale bar = 100µm).
- (E)** Proliferation 24 hours after Acetaminophen injection, as measured by Ki-67 immunostaining. Ki-67 quantification shown on the right (n = 2 and 2 females). Data is represented as mean +/- SEM, \* P<0.05, \*\* P< 0.01.
- (F)** H+E (Scale bar = 100µm) and
- (G)** Ki-67 immunostaining (black arrowheads point to positive nuclei, Scale bar = 100µm) of mouse livers exposed to DDC food for six weeks.

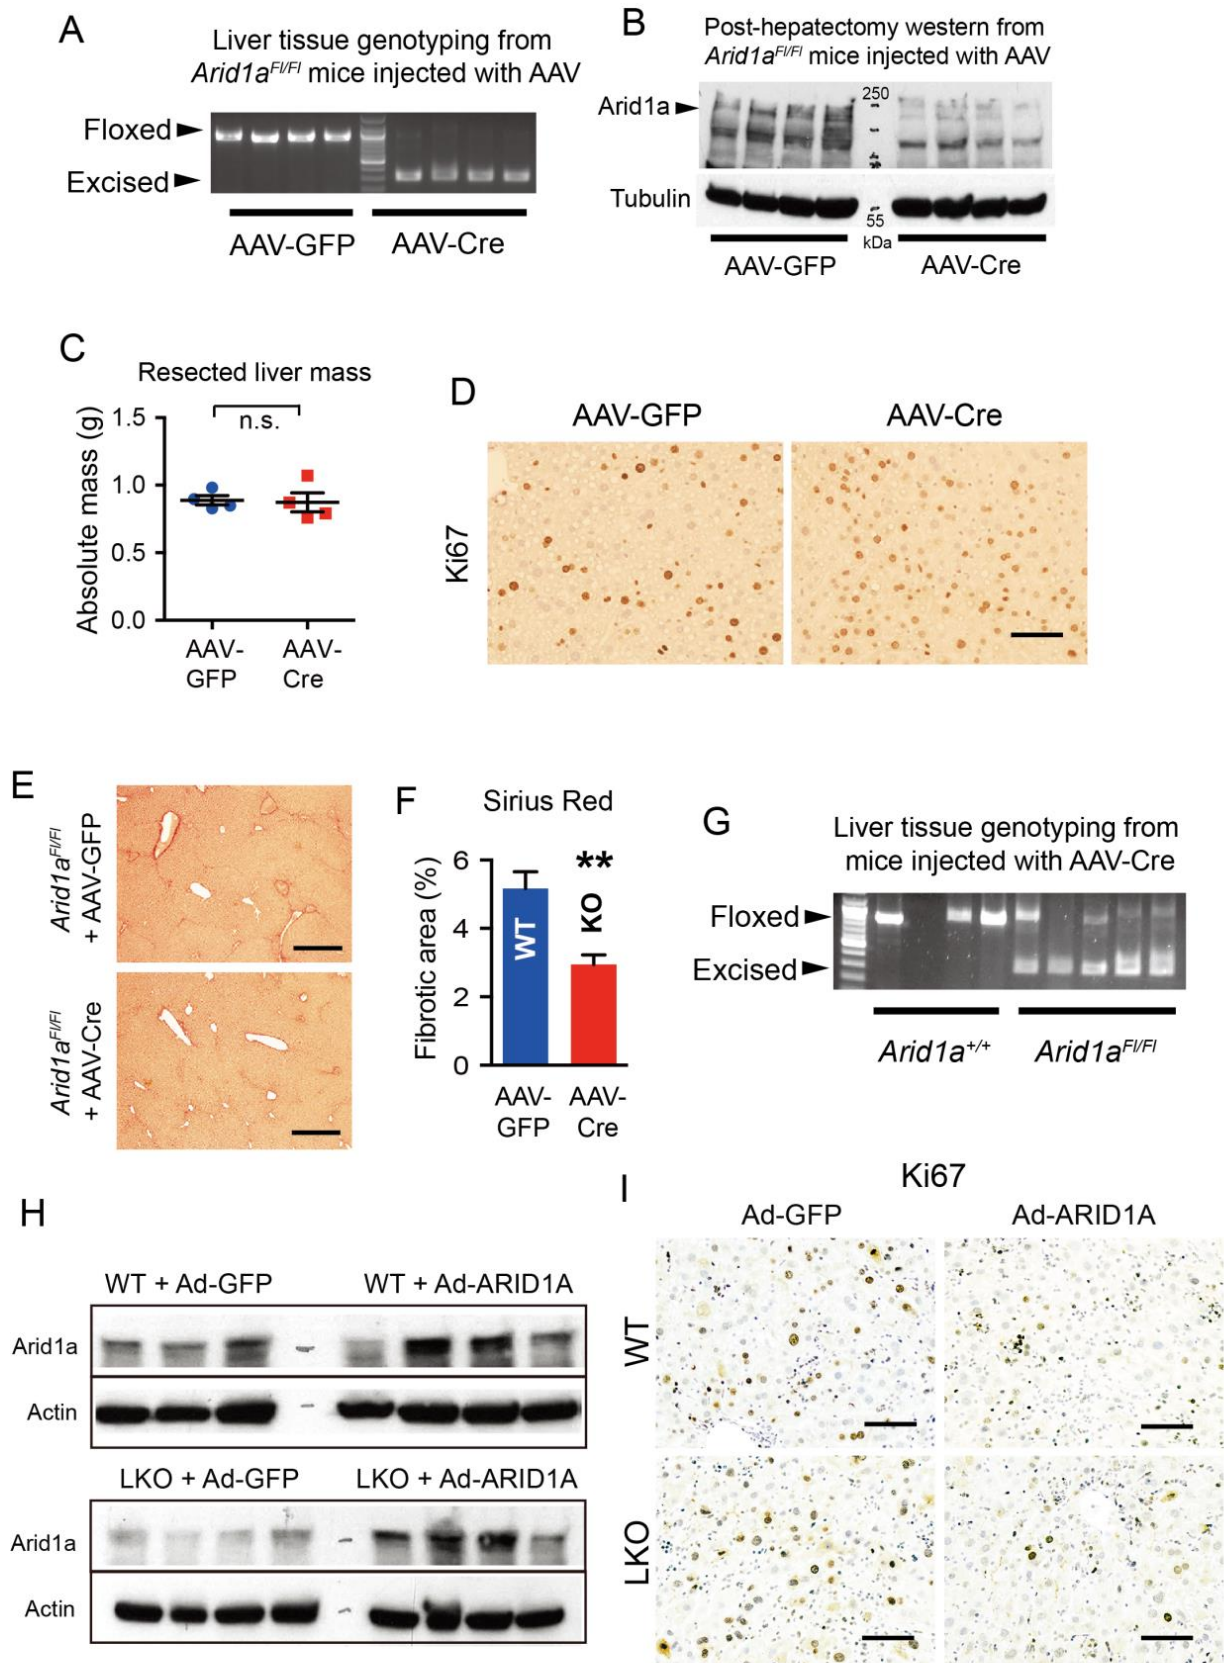

Figure S3

**Figure S3. Data related to Figure 3.**

- (A) Fourteen days after AAV-GFP or AAV-Cre delivery, we confirmed successful *Arid1a* deletion by genotyping PCR and
- (B) protein reduction by western blot analysis.
- (C) Resected liver mass during partial hepatectomy (n = 4 and 4).
- (D) Hepatocyte proliferation as measured by Ki-67 immunohistochemistry.
- (E) *Arid1a*<sup>F/FI</sup> mice were injected with biweekly CCL4 for 12 weeks. Then CCL4 was stopped and mice were randomized to either 5 x 10<sup>10</sup> particles of AAV-GFP or AAV-Cre to delete *Arid1a* in hepatocytes only. Livers were examined for fibrosis using Sirius Red after 20 days (n = 6 AAV-GFP and 5 AAV-Cre treated mice, Scale bar = 200µm).
- (F) Quantification of Sirius Red staining area (n = 6 AAV-GFP and 5 AAV-Cre mice, 7 HPFs averaged for each mouse).
- (G) For DDC experiment, genotyping of *Arid1a*<sup>F/FI</sup> livers injected with 5 x 10<sup>10</sup> particles of AAV-GFP or Cre.
- (H) Western blot for human ARID1A in WT and *Arid1a* LKO livers treated with Ad-GFP and Ad-ARID1A (n = 3, 4, 4, 4).
- (I) Ki-67 immunostaining (Scale bar = 100µm) in these livers 48 hours after one injected dose of CCL4.

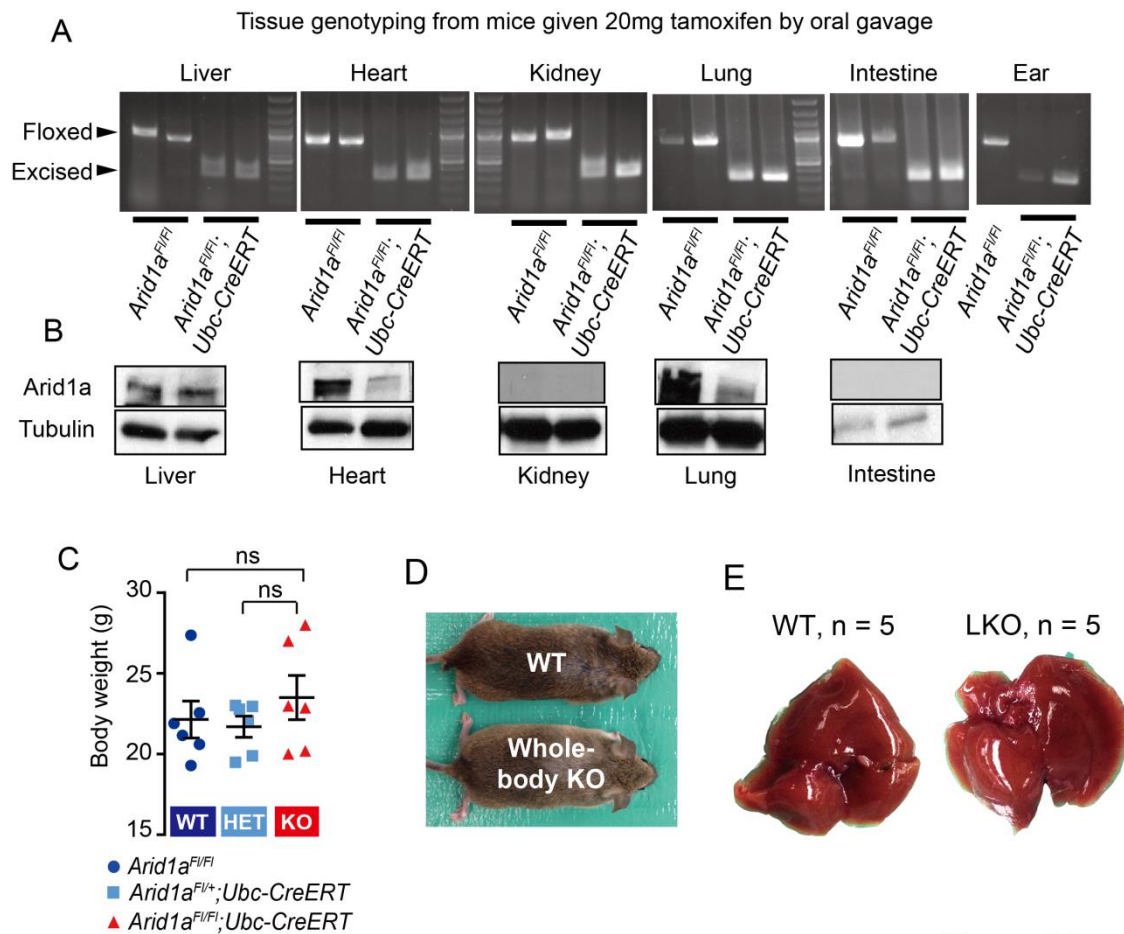

Figure S4

**Figure S4. Characterization of whole-body *Arid1a* KO mice (Related to Figure 4).**

- (A)** Genotyping of the *Arid1a* locus in multiple tissues after 20mg tamoxifen delivery by oral gavage. The top band is the floxed band (812 bp), while the lower one is the excised band (268 bp).
- (B)** Western blot showing Arid1a in various tissues from *Arid1a*<sup>F/FI</sup> and *Ubc-CreER*; *Arid1a*<sup>F/FI</sup> mice injected 500uL of 20mg/mL Tamoxifen for two consecutive days at one month of age.
- (C)** Body weights of 6 week old *Arid1a*<sup>F/FI</sup>, *Ubiquitin-CreER*; *Arid1a*<sup>+F/I</sup>, and *Ubiquitin-CreER*; *Arid1a*<sup>F/FI</sup> mice 2 weeks after tamoxifen (n = 6 WT, 4 Het, 3 KO, all males).
- (D)** 12-month old WT and whole-body *Arid1a* KO mice. At one-month of age, tamoxifen was used to induce *Arid1a* deletion (n = 8 WT and 8 KO).
- (E)** Representative images of 12-month old WT and LKO livers (n = 5 WT and 5 LKO males). All data in this figure are represented as mean +/- SEM, \* P<0.05, \*\* P< 0.01. "n" refers to biological replicates.

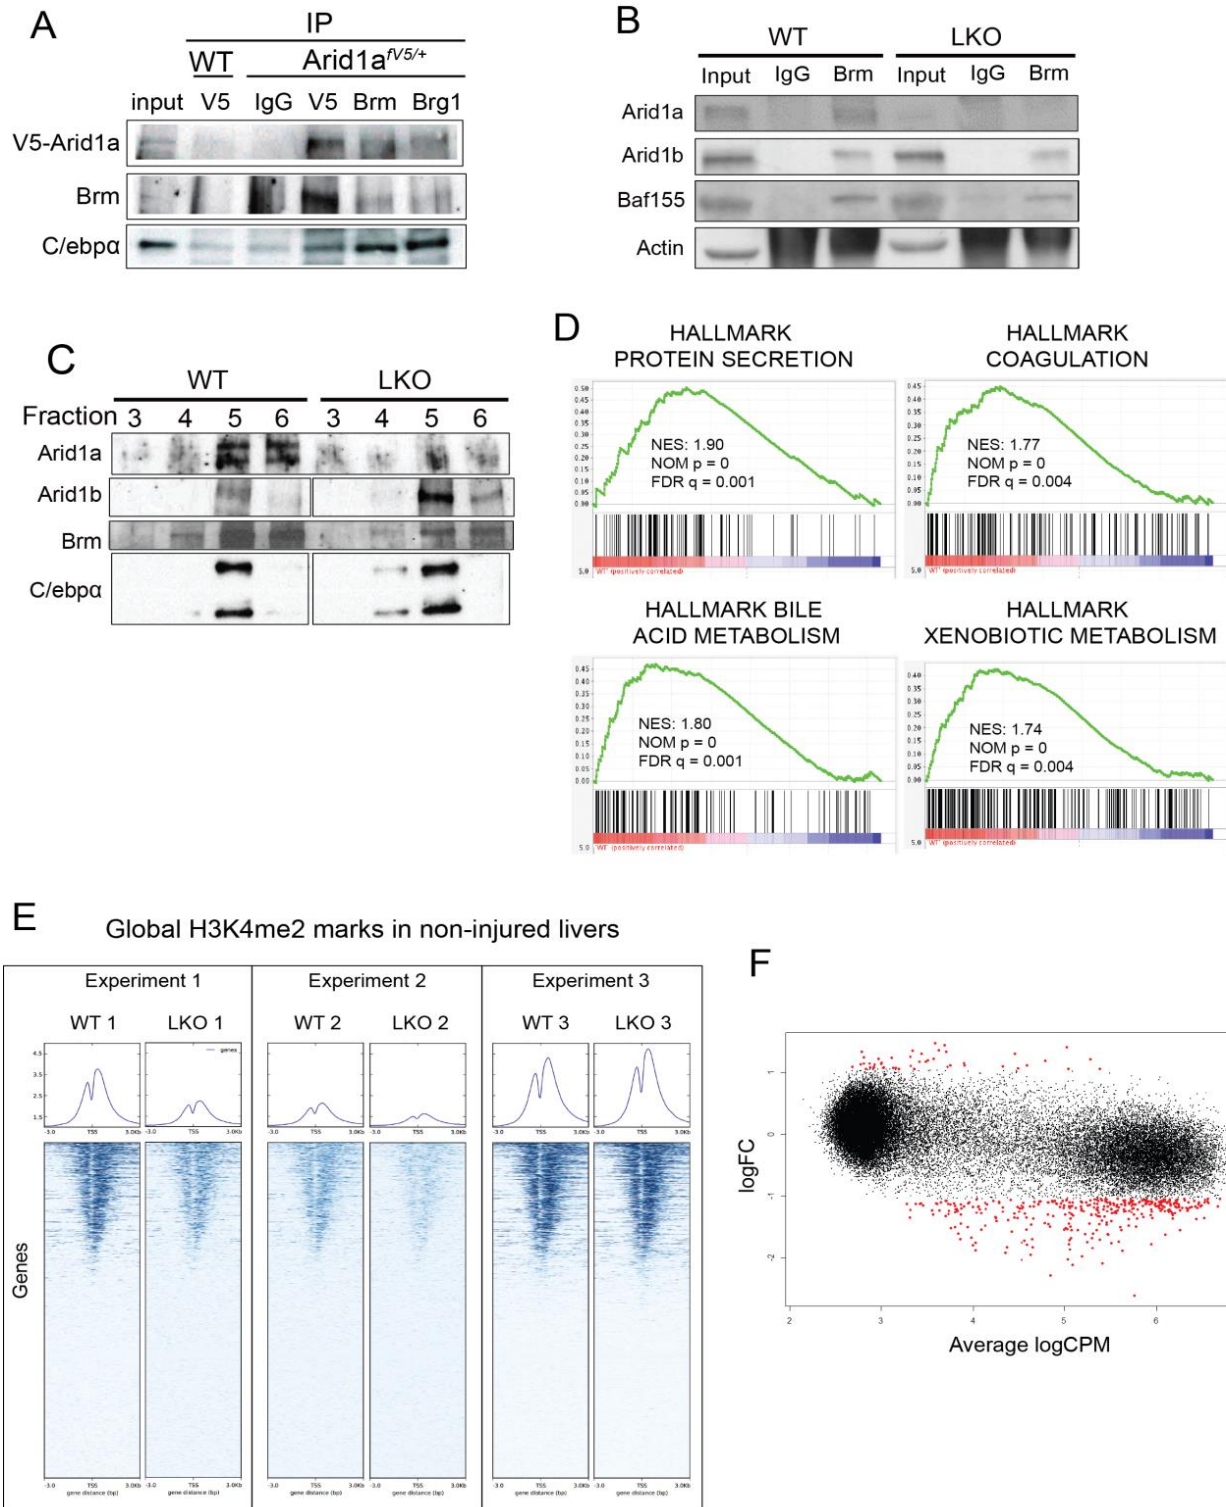

Figure S5

**Figure S5. Data related to Figure 5.**

- (A)** Co-IP experiments between Arid1a, C/ebp $\alpha$ , Brm, and Brg1. A knock-in mouse carrying *Arid1a* fused to a V5 tag (*Arid1a*<sup>V5/+</sup> mice) was used to pull down of Arid1a protein with a V5 antibody. V5 antibody was also used in non-transgenic WT livers as an additional negative control. Brm antibodies were used to pull down other SWI/SNF members as well as C/ebp $\alpha$ .
- (B)** Co-IP with Brm antibody identifies SWI/SNF complex components in either WT or LKO livers.
- (C)** Size-exclusion chromatography with nuclear lysates from *Arid1a* WT or LKO livers. Eluted fractions were probed with Arid1a, Arid1b, Brm, and C/ebp $\alpha$  antibodies.
- (D)** GSEA of RNA-seq data reveals that WT livers have increased protein secretion, coagulation, bile acid and xenobiotic metabolism gene signatures. Nominal enrichment score (NES), nominal p-value, and False discovery rate (FDR) q-value are shown in each GSEA plot.
- (E)** Genome-wide H3K4me2 marks at TSSs. Three independent ChIP-seq experiments were performed for each genotype (n = 3 and 3 WT and LKO mice).
- (F)** In this plot, each dot represents a gene's TSS region with X and Y-axes representing log counts per million and log fold change values, respectively. Out of 46515 TSS regions, 413 are significantly differentially bound (FDR<0.05) and are highlighted in red. To check for global reduction of signal in LKO compared to WT liver, the Wilcoxon signed rank test was applied to the significant gene regions and the p-value is less than  $2.2 \times 10^{-16}$ .



A

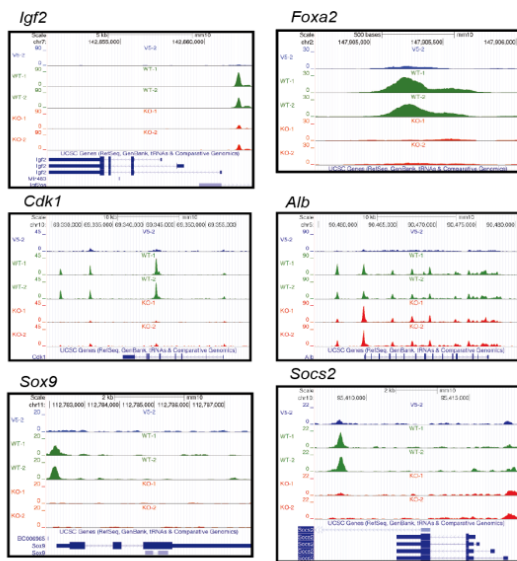

B

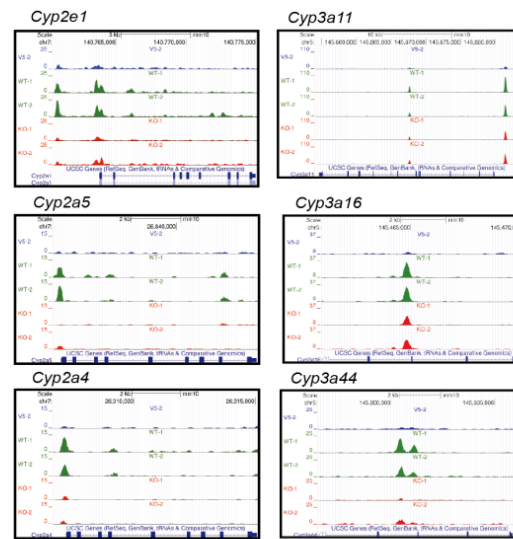

C

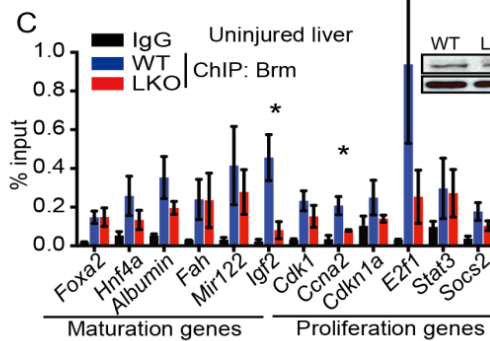

D

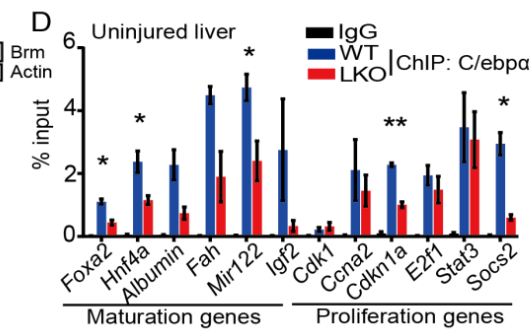

E

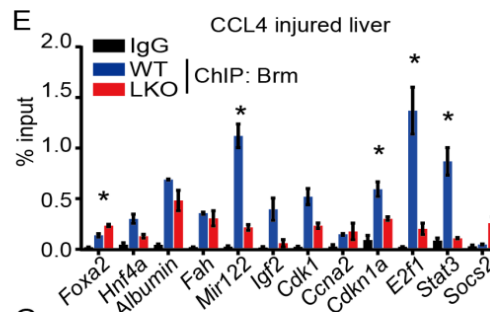

F

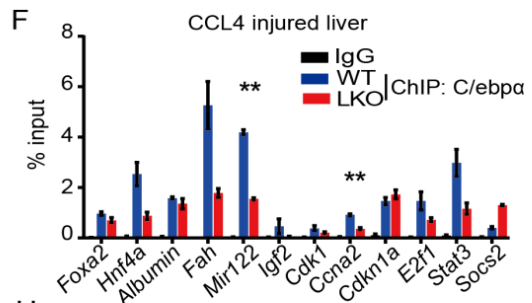

G

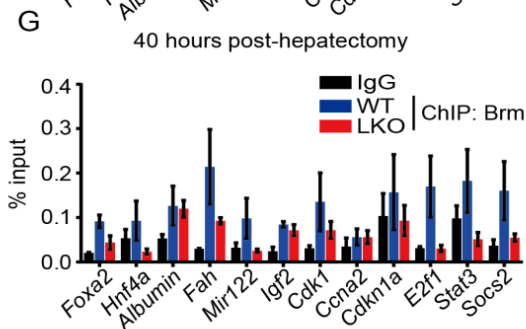

H

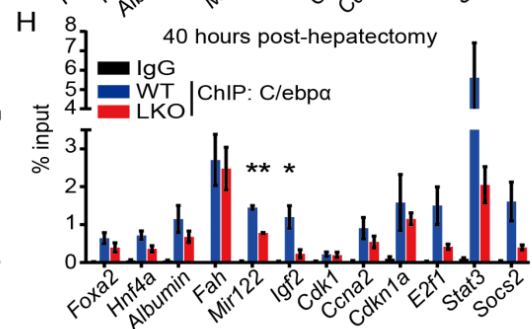

Figure S6

**Figure S6. ChIP-seq and ChIP-qPCR data related to Figure 5.**

- (A)** Individual peak traces from ChIP-seq showing common V5-Arid1a targets and C/ebp $\alpha$  targets in the context of uninjured WT and LKO livers. Note that in all of these cases, C/ebp $\alpha$  peaks are quantitatively smaller in the *Arid1a* deficient setting. Two ChIP-seq experiments were performed for each condition except for V5-Arid1a, where one sequencing experiment was performed.
- (B)** Cytochrome P450 loci commonly bound by V5-Arid1a and C/ebp $\alpha$  are shown.
- (C)** ChIP-qPCR with IgG and Brm antibody in uninjured WT and LKO livers (n = 4 and 4).
- (D)** ChIP-qPCR with IgG and C/ebp $\alpha$  antibody in uninjured WT and LKO livers (n = 3 and 3).
- (E)** ChIP-qPCR with IgG and Brm antibody in WT and LKO livers 6 hours after one CCL4 injection (n = 2 and 2).
- (F)** ChIP-qPCR with IgG and C/ebp $\alpha$  antibody in WT and LKO livers 6 hours after one CCL4 injection (n = 2 and 2).
- (G)** ChIP-qPCR with IgG and Brm antibody in WT and LKO livers 40 hours after partial hepatectomy (n = 3 and 3).
- (H)** ChIP-qPCR with IgG and C/ebp $\alpha$  antibody in WT and LKO livers 40 hours after partial hepatectomy (n = 3 and 3).

All data in this figure are represented as mean +/- SEM, \* P<0.05, \*\* P< 0.01. "n" refers to biological replicates. All ChIP-qPCR experiments were performed five times.

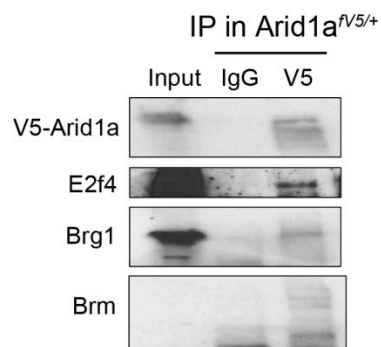

Figure S7

**Figure S7. Data related to Figure 6.**

Co-IP experiments between V5-Arid1a, E2f4, Brm, and Brg1. These were performed in WT livers.

**SUPPLEMENTAL TABLE 1, related to Figure 5 and Figure 6.**

(See accompanying Excel files)

**Table S1. ChIP-seq data.**

**Sheet 1.** ChIP-seq identified V5-Arid1a bound peaks in *Arid1a*<sup>fV5/+</sup> livers. All identified peaks ranked by q-value are listed.

**Sheet 2.** ChIP-seq identified Hnf4a bound peaks in WT p12 livers.

**Sheet 3.** Common Arid1a and Hnf4a peaks.

**Sheet 4.** ChIP-seq identified C/ebpα bound peaks in WT livers. Two independent experiments from two livers were performed, and commonly identified peaks are listed.

**Sheet 5.** Common Arid1a and C/ebpα peaks.

**Sheet 6.** Peaks differentially bound by C/ebpα in WT and LKO livers. A cutoff of FDR < 0.001 was used to generate this list.

**Sheet 7.** Peaks within 500bp of TSSs bound by E2f4 in WT and LKO livers 40 hours after partial hepatectomy.

## List of Primers used in this study.

| Primer     | Sequence (5' to 3')      | Purpose |
|------------|--------------------------|---------|
| mGapdh-F   | ACCACAGTCCATGCCATCAC     | qPCR    |
| mGapdh-R   | TCCACCACCCTGTTGCTGTA     | qPCR    |
| m18S-F     | CGGCTACCACATCCAAGGAA     | qPCR    |
| m18S-R     | AGCCGCGGTAATTCCAGC       | qPCR    |
| mArid1a-F  | TCCCAGCAAACCTGCCTATTC    | qPCR    |
| mArid1a-R  | CATATCTTCTTGCCCTCCCTTAC  | qPCR    |
| mActinB-F  | CAGAAGGAGATTACTGCTCTGGCT | qPCR    |
| mActinB-R  | TACTCCTGCTTGCTGATCCACATC | qPCR    |
| mCcmd1-F   | TGCCATCCATGCGGAAA        | qPCR    |
| mCcmd1-R   | AGCGGGAAGAACTCCTCTTC     | qPCR    |
| mCcna2-F   | TGAATCACCACATGCTAT       | qPCR    |
| mCcna2-R   | TAACCTCCATTTCCCTAAG      | qPCR    |
| mCcnb1-F   | CTCTGTAGTGAATATGTG       | qPCR    |
| mCcnb1-R   | CATCTGAACCTGTATTAG       | qPCR    |
| mCcnb2-F   | TCTTGCTGTCTCAGAAG        | qPCR    |
| mCcnb2-R   | CTCCATGTAGCCTGTGTAA      | qPCR    |
| mCyp1a1-F  | GTCCAGCTGTCAGATGATAAGG   | qPCR    |
| mCyp1a1-R  | TACATGAGGCTCCACGAGATA    | qPCR    |
| mCyp2d22-F | TTGAACTACAGGGCTTCCTTATC  | qPCR    |
| mCyp2d22-R | TCTCCAGACAGTCTCATCTT     | qPCR    |
| mCyp3a13-F | GCAGGGATTAGGAGAAGGAAAG   | qPCR    |
| mCyp3a13-R | GTGGGTTGTTGAGGGAATCA     | qPCR    |
| mCyp3a16-F | ACCGCGTGGACTTTATTTATCT   | qPCR    |
| mCyp3a16-R | CTGGGCTGTGATCTCGATTT     | qPCR    |
| mCyp3a41-F | CCAGAAGAACTGCAGGAAGA     | qPCR    |
| mCyp3a41-R | CCAGGTATTCCATCTCCATCAC   | qPCR    |
| mCyp3a44-F | CAGAAGCACCGAGTGGATTT     | qPCR    |
| mCyp3a44-R | CTGGACTGTGATCTCCATGTTAG  | qPCR    |
| mCyp2e1-F  | TGACTGACTGTCTCCTCATAGA   | qPCR    |
| mCyp2e1-R  | TCGGCCAAAGTCACAGAAATA    | qPCR    |
| mCyp2a12-F | GTCAGCTCCACACTACGATATG   | qPCR    |
| mCyp2a12-R | GCCAATCACTCGGTCAATCT     | qPCR    |
| mCyp2a22-F | TGAGACAGTCAGCTCCTTACTA   | qPCR    |
| mCyp2a22-R | GCCAATCACTCGGTCAATCT     | qPCR    |
| mCyp2a4-F  | CTTCATCGACTCCTTCTCATC    | qPCR    |
| mCyp2a4-R  | GTGCCAGCAAAGAAGAGATTTAG  | qPCR    |
| mCyp2a5-F  | CAACCCAAAGCACTTCTCTAGA   | qPCR    |
| mCyp2a5-R  | CCAGTCCTTCTCCGAAACAATA   | qPCR    |
| mCyp2c29-F | CCAATCCTTCAACCACTTCTCA   | qPCR    |
| mCyp2c29-R | AGCTTCCTTCACTGCTTCATAC   | qPCR    |
| mCyp2c39-F | GAGGAAGCATTCCAATGGTAGA   | qPCR    |
| mCyp2c39-R | TGAGTGTGAAGCGCCTAATC     | qPCR    |
| mCyp2c50-F | CAGAGACAACAAGCACAAACAC   | qPCR    |
| mCyp2c50-R | GCCGATCACATGCTCAATTC     | qPCR    |
| mCyp2j5-F  | CTGGTGGAAAGCCATAAGAGAG   | qPCR    |
| mCyp2j5-R  | CCAAAGGTGACAGAGCAAATG    | qPCR    |
| mCyp3a11-F | ACCACCAGTAGCACACTTTC     | qPCR    |

|                |                                 |            |
|----------------|---------------------------------|------------|
| mCyp3a11-R     | CCAGGTATTCCATCTCCATCAC          | qPCR       |
| mCyp4a10-F     | CCCTGATGGACGCTCTTTAC            | qPCR       |
| mCyp4a10-R     | GGGTCAAACACCTCTGGATT            | qPCR       |
| mCyp4f14-F     | TCTGTCTCATCAGCATCTTTGG          | qPCR       |
| mCyp4f14-R     | CCGCCGAGAAGGGAATAAAT            | qPCR       |
| mCyp1a2-F      | TCCTGGAGATCTACCGATACAC          | qPCR       |
| mCyp1a2-R      | TGACCTGCCACTGGTTTATG            | qPCR       |
| mFoxa2_F       | AGG CAG CGA TTT GCC TCT         | ChIP-qPCR  |
| mFoxa2_R       | CCA CAA GGC CCA TTA TTG AT      | ChIP-qPCR  |
| mHnf4a_F       | GGA AGC CAA TAT GCT GTT GC      | ChIP-qPCR  |
| mHnf4a_R       | CTC ATG GGT GAT GTT TGC AC      | ChIP-qPCR  |
| mE2f1_F        | GGT TCA CCG AGA ACA GGA AG      | ChIP-qPCR  |
| mE2f1_R        | ACT TTG ACC AGG ATG GGA TG      | ChIP-qPCR  |
| mCna2_F        | AGA AAC AGA AGA TTT GGG CAC T   | ChIP-qPCR  |
| mCna2_R        | ACC GAC AGG CTT ATT TTT ACA GA  | ChIP-qPCR  |
| mSocs2_F       | TGG GTT TTC TAA CCT AAC CAC AA  | ChIP-qPCR  |
| mSocs2_R       | GTG TCC CAT GAC TTG CCT TT      | ChIP-qPCR  |
| mFah_F         | TTG GTT GGC TCA GGT TAA GG      | ChIP-qPCR  |
| mFah_R         | TCC TTT CAT ATC CTG CCT GTG     | ChIP-qPCR  |
| mStat3_F       | TCT TTG TTT CCC TAG CTT CTG C   | ChIP-qPCR  |
| mStat3_R       | TGG TAA ACT CGA CGA GAC GAT     | ChIP-qPCR  |
| mIgf2_F        | TTG AAC AAG GGG GAG TTT GT      | ChIP-qPCR  |
| mIgf2_R        | GAT CCC CCA ATT CCT AGG TT      | ChIP-qPCR  |
| mCdkn1a_F      | AGT TCT TGC CCT GGG TCT TT      | ChIP-qPCR  |
| mCdkn1a_R      | AGC CCC ATA GCC ACA ACT CT      | ChIP-qPCR  |
| mMir122a_F     | AAC TCC AAA AGG CAG GGT TT      | ChIP-qPCR  |
| mMir122a_R     | GAG AAC CAA CAA TAT CTG GGA ATC | ChIP-qPCR  |
| mAlb_F         | GCA AAC ATA CGC AAG GGA TT      | ChIP-qPCR  |
| mAlb_R         | TGG GGT TGA TAG GAA AGG TG      | ChIP-qPCR  |
| mArid1a GENO-F | GTAATGGGAAAGCGACTACTGGAG        | Genotyping |
| mArid1a GENO-R | TGTTTCATTTTTGTGGCGGGAG          | Genotyping |
